# Supplementary material for: Identification of CpG-SNPs associated with type 2 diabetes and differential DNA methylation in human pancreatic islets
Source: Springer Nature journal article supplement (doi:10.1007/s00125-012-2815-7), 2013-03-05
Supplement: MOESM1 [file 8091382]

**ESM Table 1. DNA sequences for Pyrosequencing forward, reverse and sequencing primers.**

| <b>SNP ID</b> | <b>Gene</b>    | <b>Forward PCR Primer</b>            | <b>Reverse PCR Primer</b>                 | <b>Sequencing Primer</b>          |
|---------------|----------------|--------------------------------------|-------------------------------------------|-----------------------------------|
| rs7754840     | <i>CDKALI</i>  | 5'-TTGTTGGGGAAGAAGTAGTAATG-3'        | Bio 5'-CCTTTTAAATCTTTTCACTCATCTTAC-3'     | 5'-AGAAGTAGTAATGTTGGAA-3'         |
| rs13292136    | <i>CHCHD9</i>  | 5'-TGGTATTTGGTTTTGGTTTTGAGAA-3'      | Bio 5'-ACCTCCCTCTATAACTCACTTTT-3'         | 5'-GTGTTTTTAAGTTTTTATTAGGT-3'     |
| rs2334499     | <i>DUSP8</i>   | Bio 5'-AGGGATAGTGAAATATTGTATGTTTG-3' | 5'-ACCCTACACCTCTCAATAACAACACTACT-3'       | 5'-CAATAACAACACTACTCACTC-3'       |
| rs7578326     | <i>IRS1</i>    | Bio 5'-AAGTATTGGTTTATGAAAATGGTATT-3' | 5'-TCCCTATTCTCAACATATAACACTTTAC-3'        | 5'-AAACAAACTACAACAATATTTAC-3'     |
| rs391300      | <i>SRR</i>     | 5'-GGTAGTTTAGGTTATTTGGGAGGTTAAG-3'   | Bio 5'-ACAACAACAAAAAAAAATCCAAATATTC-3'    | 5'-GAATAGTTATTGTATTGTGGT-3'       |
| rs7961581     | <i>TSPAN8</i>  | 5'-GTATAGATTTATTTAAATGAAGGGGATTTT-3' | Bio 5'-ATTAACTACCTCAATTTAACTACATTCT-3'    | 5'-TTAATAATAAGTTGGATGTTAAAG-3'    |
| rs564398      | <i>CDKN2A</i>  | 5'-AGGTGTGGGTTTTAGTGGT-3'            | Bio 5'-TCCTCAACTCCTCTCATCTAATCT-3'        | 5'-GTTTTAGTGGTATATATTATTTTT-3'    |
| rs5015480     | <i>HHEX</i>    | 5'-GTTTTTTGGTGTATTTTTTTGAGTAGG-3'    | Bio 5'-ACAAATTTATATCCCAATACTTCCAC-3'      | 5'-AATAAATAATAGGGTATTGAAGTAA-3'   |
| rs1801282     | <i>PPARG</i>   | 5'-GTTATGGGTGAAATTTGGGAGAT-3'        | Bio 5'-ACTACAAAAACAATTTACCCTTACATA-3'     | 5'-GTGAAATTTTGGGAGATT-3'          |
| rs7901695     | <i>TCF7L2</i>  | 5'-ATTGTGGATTTGTTGTTTTGATAT-3'       | Bio 5'-CTATCCATAACAATAAAATATTATTTAACCA-3' | 5'-GGATTTGTTGTTTTGATATT-3'        |
| rs5945326     | <i>DUSP9</i>   | 5'-AGGGTTATTAGAGTAGGGATTTAG-3'       | Bio 5'-ACATCTATCTCCAAAACTTACACC-3'        | 5'-ATTTTTTTTTTTTGGGGTTTAT-3'      |
| rs13266634    | <i>SLC30A8</i> | 5'-TTGAAGTTGGAGTTAGAGTAGT-3'         | Bio 5'-AATCCTAATCAACTAAAAATCCATCT-3'      | 5'-GTGTTTTTTTATTAATAGTAGTTAG-3'   |
| rs1531343     | <i>HMG2</i>    | 5'-GTTATTTATGTGGGATATAGAGATAAGT-3'   | Bio 5'-CTAAAATCTATCTTTTACATCTACCCTACAA-3' | 5'- ATATTAGTGATATTTAAAAATGTTAA-3' |
| rs2237895     | <i>KCNQ1</i>   | 5'-AGATAGTAAGATTTGGGTTAGTAGAGTA-3'   | Bio 5'-ACCCATCTACCTCTTAATCTCATCTTT-3'     | 5'-AGTAGATGATAGGGTAGTGA-3'        |
| rs11708067    | <i>ADCY5</i>   | 5'-AGTAGTGGTATAGTTAGGTTGTATT-3'      | Bio 5'-ACACAACAACCTCTTTCTAAAC-3'          | 5'-TTTAGATAGAAGTTGTTGATAGTA-3'    |
| rs1801214     | <i>WFS1</i>    | 5'-TGGTTTTTATTTGAAGGTTTTGGTTAGA-3'   | Bio 5'-CCCTTAAAATTCCTCAACTATACCAT-3'      | 5'-GAAGGTTTTTGGTTAGAT-3'          |
| rs4712523     | <i>CDKALI</i>  | 5'-TGGTTTTTATGAGAGTGAGGTAAAGT-3'     | Bio 5'-AAAACAAATCCCACCCCACTACTAT-3'       | 5'-GTTTGATAAGATGTTGTTTTTT-3'      |
| rs3821943     | <i>WFS1</i>    | 5'-GGGTTAGGTTATTTTTAGTTGTTTTGT-3'    | Bio 5'-ACCAACCTACTCCAAAATTTATTTAA-3'      | 5'-GGGGATTAATTGAGTAGTTT-3'        |
| rs12778642    | <i>HHEX</i>    | 5'-AGAGTAGGAGTATTAGGTTGTTAAGA-3'     | Bio 5'-CCTCCCAAAATACTAAAATCACAACATAA-3'   | 5'-TTAGGTGGGTTAAATGAAAA-3'        |

Bio: biotinylated primer
