# Supplementary material for: Identification of CpG-SNPs associated with type 2 diabetes and differential DNA methylation in human pancreatic islets
Source: Springer Nature journal article supplement (doi:10.1007/s00125-012-2815-7), 2013-03-05
Supplement: MOESM2 [file 8091382]

**ESM Table 2. Degree of DNA methylation for each genotype of the T2D associated CpG-SNPs and surrounding CpG sites in human pancreatic islets.**

| SNP ID     | Gene symbol   | Genotype | n  | CpG 1              |                               | CpG 2             |                               | CpG 3     |         | CpG 4     |         | CpG 5     |         |
|------------|---------------|----------|----|--------------------|-------------------------------|-------------------|-------------------------------|-----------|---------|-----------|---------|-----------|---------|
|            |               |          |    | Mean ± SD          | P-value                       | Mean ± SD         | P-value                       | Mean ± SD | P-value | Mean ± SD | P-value | Mean ± SD | P-value |
| rs7754840  | <i>CDKAL1</i> | GG       | 29 | <b>0.12 ± 0.32</b> |                               |                   |                               |           |         |           |         |           |         |
|            |               | CG       | 38 | <b>36.1 ± 3.2</b>  | <b>1.3 x 10<sup>-13</sup></b> |                   |                               |           |         |           |         |           |         |
|            |               | CC       | 10 | <b>65.7 ± 7.8</b>  |                               |                   |                               |           |         |           |         |           |         |
| rs13292136 | <i>CHCHD9</i> | TT       | 0  | -                  |                               |                   |                               |           |         |           |         |           |         |
|            |               | CT       | 11 | <b>53.9 ± 4.6</b>  | <b>4.2 x 10<sup>-6</sup></b>  |                   |                               |           |         |           |         |           |         |
|            |               | CC       | 49 | <b>88.5 ± 3.9</b>  |                               |                   |                               |           |         |           |         |           |         |
| rs2334499  | <i>DUSP8</i>  | AA       | 17 | <b>0.3 ± 0.9</b>   |                               |                   |                               |           |         |           |         |           |         |
|            |               | AG       | 44 | <b>35.7 ± 4.5</b>  | <b>1.6 x 10<sup>-13</sup></b> |                   |                               |           |         |           |         |           |         |
|            |               | GG       | 19 | <b>67.9 ± 2.8</b>  |                               |                   |                               |           |         |           |         |           |         |
| rs7578326  | <i>IRS1</i>   | AA       | 26 | <b>0.0 ± 0.0</b>   |                               |                   |                               |           |         |           |         |           |         |
|            |               | AG       | 30 | <b>25.9 ± 4.4</b>  | <b>7.2 x 10<sup>-15</sup></b> |                   |                               |           |         |           |         |           |         |
|            |               | GG       | 22 | <b>53.0 ± 5.9</b>  |                               |                   |                               |           |         |           |         |           |         |
| rs391300   | <i>SRR</i>    | AA       | 12 | <b>14.6 ± 2.7</b>  |                               |                   |                               |           |         |           |         |           |         |
|            |               | AG       | 45 | <b>51.9 ± 3.5</b>  | <b>1.2 x 10<sup>-13</sup></b> |                   |                               |           |         |           |         |           |         |
|            |               | GG       | 25 | <b>88.0 ± 2.7</b>  |                               |                   |                               |           |         |           |         |           |         |
| rs7961581  | <i>TSPAN8</i> | TT       | 32 | <b>0.1 ± 0.5</b>   |                               |                   |                               |           |         |           |         |           |         |
|            |               | TC       | 18 | <b>37.4 ± 2.2</b>  | <b>1.8 x 10<sup>-10</sup></b> |                   |                               |           |         |           |         |           |         |
|            |               | CC       | 5  | <b>72.2 ± 3.4</b>  |                               |                   |                               |           |         |           |         |           |         |
| rs564398   | <i>CDKN2A</i> | AA       | 28 | <b>6.9 ± 2.8</b>   |                               | 65.89 ± 2.0       |                               |           |         |           |         |           |         |
|            |               | AG       | 39 | <b>55.0 ± 3.4</b>  | <b>6.3 x 10<sup>-15</sup></b> | 70.7 ± 2.6        | 6.1 x 10 <sup>-12</sup>       |           |         |           |         |           |         |
|            |               | GG       | 17 | <b>91.4 ± 1.6</b>  |                               | 76.0 ± 2.7        |                               |           |         |           |         |           |         |
| rs5015480  | <i>HHEX</i>   | AA       | 11 | 66.3 ± 3.3         |                               | <b>1.6 ± 0.2</b>  |                               |           |         |           |         |           |         |
|            |               | AG       | 40 | 70.1 ± 4.5         | 0.22                          | <b>36.1 ± 2.9</b> | <b>4.2 x 10<sup>-12</sup></b> |           |         |           |         |           |         |
|            |               | GG       | 22 | 70.9 ± 4.7         |                               | <b>70.2 ± 4.9</b> |                               |           |         |           |         |           |         |
| rs1801282  | <i>PPARG</i>  | CC       | 43 | <b>1.8 ± 0.4</b>   |                               | 82.9 ± 7.5        |                               |           |         |           |         |           |         |
|            |               | CG       | 15 | <b>24.6 ± 1.9</b>  | <b>1.6 x 10<sup>-7</sup></b>  | 83.5 ± 6.2        | > 0.99                        |           |         |           |         |           |         |
|            |               | GG       | 0  | -                  |                               | -                 |                               |           |         |           |         |           |         |

|            |                |    |    |                   |                         |                         |                   |                   |                               |                   |                               |            |                        |  |
|------------|----------------|----|----|-------------------|-------------------------|-------------------------|-------------------|-------------------|-------------------------------|-------------------|-------------------------------|------------|------------------------|--|
| rs7901695  | <i>TCF7L2</i>  | AA | 43 | 3.9 ± 1.1         | 5.6 × 10 <sup>-12</sup> | 5.6 × 10 <sup>-12</sup> | <b>5.3 ± 1.4</b>  |                   |                               |                   |                               |            |                        |  |
|            |                | AG | 32 | 48.2 ± 3.0        |                         |                         | <b>49.6 ± 2.9</b> |                   |                               |                   |                               |            |                        |  |
|            |                | GG | 2  | 93.8 ± 2.3        |                         |                         | <b>89.9 ± 0.1</b> |                   |                               |                   |                               |            |                        |  |
| rs5945326  | <i>DUSP9</i>   | AA | 52 | <b>3.2 ± 1.1</b>  | 7.7 × 10 <sup>-13</sup> | 0.23                    | 77.0 ± 6.8        | 73.5 ± 7.4        |                               |                   |                               |            |                        |  |
|            |                | AG | 8  | <b>39.3 ± 2.7</b> |                         |                         | 77.7 ± 2.3        | 68.9 ± 4.1        | > 0.99                        |                   |                               |            |                        |  |
|            |                | GG | 24 | <b>77.7 ± 5.1</b> |                         |                         | 80.6 ± 3.3        | 73.4 ± 6.5        |                               |                   |                               |            |                        |  |
| rs13266634 | <i>SLC30A8</i> | AA | 5  | <b>0.66 ± 0.6</b> | 2.3 × 10 <sup>-5</sup>  | > 0.99                  | 8.4 ± 1.6         | 14.4 ± 4.3        |                               |                   |                               |            |                        |  |
|            |                | AG | 31 | <b>2.3 ± 1.1</b>  |                         |                         | 9.8 ± 2.4         | 17.5 ± 4.5        | > 0.99                        |                   |                               |            |                        |  |
|            |                | GG | 40 | <b>3.8 ± 1.5</b>  |                         |                         | 9.6 ± 2.5         | 17.4 ± 4.2        |                               |                   |                               |            |                        |  |
| rs1531343  | <i>HMGA2</i>   | GG | 43 | 71.4 ± 3.0        | 6.7 × 10 <sup>-6</sup>  | 1.8 × 10 <sup>-5</sup>  | 85.7 ± 3.0        | <b>n.a.</b>       | 74.2 ± 4.4                    |                   |                               |            |                        |  |
|            |                | CG | 12 | 58.8 ± 1.7        |                         |                         | 77.4 ± 3.1        | <b>32.5 ± 3.1</b> | <b>3.0 × 10<sup>-11</sup></b> | 52.8 ± 12.1       | 0.0010                        |            |                        |  |
|            |                | CC | 1  | 47.2 ± 0.0        |                         |                         | 73.6 ± 0.0        | <b>72.3 ± 0.0</b> |                               | 51.4 ± 0.0        |                               |            |                        |  |
| rs2237895  | <i>KCNQ1</i>   | AA | 16 | 98.9 ± 1.5        | 0.047                   | 0.96                    | 98.9 ± 1.8        | <b>9.8 ± 4.0</b>  | 85.9 ± 2.3                    |                   |                               |            |                        |  |
|            |                | AC | 29 | 97.1 ± 3.0        |                         |                         | 98.9 ± 1.7        | <b>49.2 ± 4.9</b> | <b>3.6 × 10<sup>-9</sup></b>  | 79.7 ± 7.7        | 6.2 × 10 <sup>-7</sup>        |            |                        |  |
|            |                | CC | 10 | 94.6 ± 3.9        |                         |                         | 96.5 ± 2.8        | <b>80.0 ± 4.7</b> |                               | 75.1 ± 3.4        |                               |            |                        |  |
| rs11708067 | <i>ADCY5</i>   | AA | 45 | 8.6 ± 2.3         | 0.00020                 | 8.6 × 10 <sup>-11</sup> | <b>3.9 ± 1.5</b>  | 14.2 ± 5.4        | 8.1 ± 1.8                     | 12.3 ± 4.6        |                               |            |                        |  |
|            |                | AG | 26 | 12.5 ± 4.0        |                         |                         | <b>15.9 ± 4.0</b> | 16.3 ± 3.7        | 0.11                          | 12.2 ± 3.5        | 0.00011                       | 18.4 ± 5.6 | 0.0015                 |  |
|            |                | GG | 2  | 15.0 ± 0.1        |                         |                         | <b>31.0 ± 4.8</b> | 17.6 ± 0.0        |                               | 12.9 ± 0.0        | 21.1 ± 0.0                    |            |                        |  |
| rs1801214  | <i>WFS1</i>    | TT | 21 | 95.3 ± 3.2        | > 0.99                  | > 0.99                  | 99.0 ± 3.4        | 87.5 ± 3.9        | <b>10.6 ± 1.8</b>             | 87.9 ± 6.7        |                               |            |                        |  |
|            |                | CT | 26 | 96.4 ± 3.0        |                         |                         | 99.8 ± 0.5        | 90.1 ± 3.3        | 0.0096                        | <b>38.2 ± 5.3</b> | <b>7.4 × 10<sup>-10</sup></b> | 93.5 ± 2.6 | 7.2 × 10 <sup>-5</sup> |  |
|            |                | CC | 10 | 97.8 ± 2.0        |                         |                         | 99.9 ± 0.3        | 93.3 ± 4.2        |                               | <b>71.2 ± 4.2</b> |                               | 94.6 ± 1.4 |                        |  |

CpG-SNP data is in bold. n.a., not analyzable due to lack of CpG site (i.e., 0% DNA methylation). *P*-values are corrected for multiple testing using Bonferroni correction (n=16).
