# Supplementary material for: Identification of CpG-SNPs associated with type 2 diabetes and differential DNA methylation in human pancreatic islets
Source: Springer Nature journal article supplement (doi:10.1007/s00125-012-2815-7), 2013-03-05
Supplement: MOESM4 [file 8091382]

**ESM Table 4. Degree of DNA methylation for each genotype of CpG-SNPs in LD ( $r^2>0.8$ ) with the following T2D associated CpG-SNPs rs7754840 (*CDKALI*), rs1801214 (*WFSI*) and rs5015480 (*HHEX*), respectively, and some surrounding CpG sites, in human pancreatic islets.**

| SNP ID     | Gene symbol   | Genotype | n  | CpG 1                            |                               | CpG 2           |                 | CpG 3          |                              |
|------------|---------------|----------|----|----------------------------------|-------------------------------|-----------------|-----------------|----------------|------------------------------|
|            |               |          |    | Mean $\pm$ SD                    | <i>P</i> -value               | Mean $\pm$ SD   | <i>P</i> -value | Mean $\pm$ SD  | <i>P</i> -value              |
| rs4712523  | <i>CDKALI</i> | AA       | 26 | <b>6.2 <math>\pm</math> 2.5</b>  | <b>1.7 x 10<sup>-11</sup></b> |                 |                 |                |                              |
|            |               | AG       | 30 | <b>51.7 <math>\pm</math> 2.4</b> |                               |                 |                 |                |                              |
|            |               | GG       | 6  | <b>97.2 <math>\pm</math> 1.8</b> |                               |                 |                 |                |                              |
| rs3821943  | <i>WFSI</i>   | TT       | 16 | <b>0.7 <math>\pm</math> 1.1</b>  | <b>4.2 x 10<sup>-10</sup></b> | 56.4 $\pm$ 13.5 | 0.83            |                |                              |
|            |               | CT       | 26 | <b>28.5 <math>\pm</math> 5.1</b> |                               | 56.3 $\pm$ 9.2  |                 |                |                              |
|            |               | CC       | 10 | <b>56.5 <math>\pm</math> 9.5</b> |                               | 59.2 $\pm$ 8.5  |                 |                |                              |
| rs12778642 | <i>HHEX</i>   | TT       | 8  | <b>2.36 <math>\pm</math> 1.6</b> | <b>3.6 x 10<sup>-11</sup></b> | 95.7 $\pm$ 3.3  | 0.00012         | 80.3 $\pm$ 1.2 | <b>1.6 x 10<sup>-5</sup></b> |
|            |               | GT       | 39 | <b>36.2 <math>\pm</math> 1.6</b> |                               | 97.8 $\pm$ 2.4  |                 | 82.4 $\pm$ 1.6 |                              |
|            |               | GG       | 14 | <b>85.0 <math>\pm</math> 3.8</b> |                               | 99.7 $\pm$ 1.2  |                 | 84.2 $\pm$ 1.5 |                              |

CpG-SNP data is in bold. Data are presented as mean  $\pm$  SD.
